# Supplementary material
Source: Springer Nature journal article supplement (https://www.springermedizin.de/resource/supplementary/12931_2013_1383_MOESM9_ESM.pdf/9426148)

## A. Ciliated cell

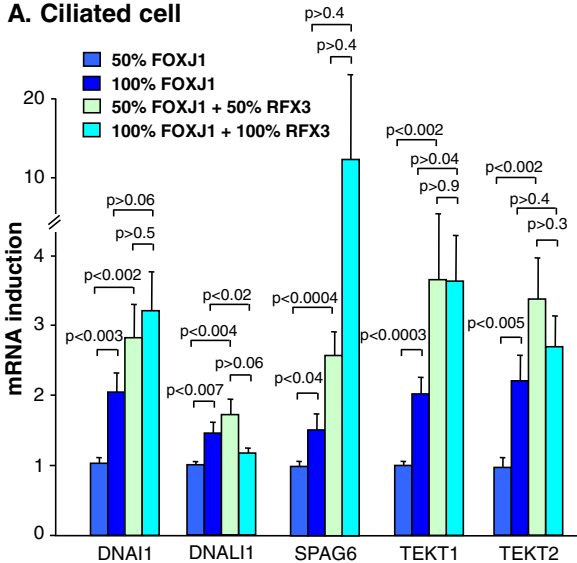

## B. Basal cell

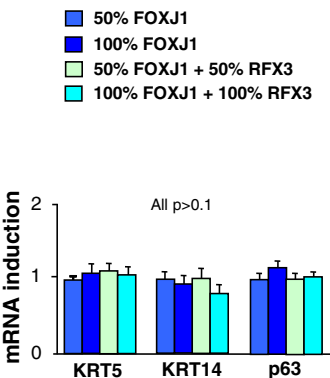

## C. Promoter activity

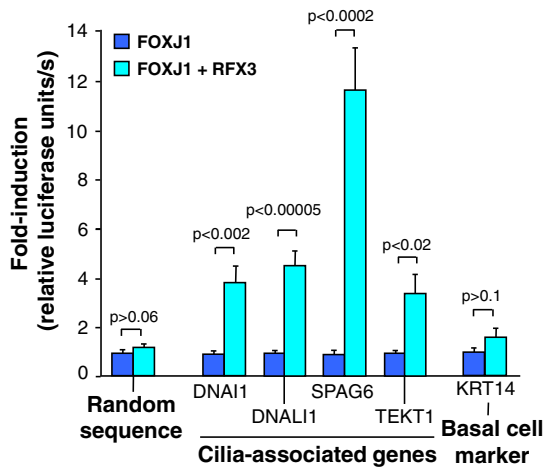

Supplement: MOESM9 [file 9426148]
